# Supplementary material for: Positive LGI1 Antibodies in CSF and Relapse Relate to Worse Outcome in Anti-LGI1 Encephalitis
Source: PubMed Central journal article supplement (PMC8718904; doi:10.3389/fimmu.2021.772096), 2021-12-17
Supplement: Table_1.pdf [file Table_1.pdf]

**Supplemental Table 1. The Barthel Index used to evaluate the patients' abilities of daily living with a full score of 100.**

|                                   | <b>Item</b>                                                  | <b>Score</b> |
|-----------------------------------|--------------------------------------------------------------|--------------|
| Feeding                           | Independent                                                  | 10           |
|                                   | Needs help                                                   | 5            |
|                                   | Unable                                                       | 0            |
| Bathing                           | Independent                                                  | 5            |
|                                   | Unable                                                       | 0            |
| Grooming                          | Independent                                                  | 5            |
|                                   | Unable                                                       | 0            |
| Dressing                          | Independent                                                  | 10           |
|                                   | Needs help                                                   | 5            |
|                                   | Unable                                                       | 0            |
| Bowel control                     | Continent                                                    | 10           |
|                                   | Occasional accident                                          | 5            |
|                                   | Incontinent (or needs to be given enemas)                    | 0            |
| Bladder control                   | Continent                                                    | 10           |
|                                   | Occasional accident                                          | 5            |
|                                   | Incontinent (catheterized, unable to manage alone)           | 0            |
| Toilet use                        | Independent                                                  | 10           |
|                                   | Needs help                                                   | 5            |
|                                   | Unable                                                       | 0            |
| Transfers (bed to chair and back) | Independent                                                  | 15           |
|                                   | Needs minor help (verbal or physical)                        | 10           |
|                                   | Needs major help (1-2 people, physical, can sit)             | 5            |
|                                   | Unable                                                       | 0            |
| Mobility on level surfaces        | Independent (but may use any aid, e.g. stick) >50 yards      | 15           |
|                                   | Walks with help of one person (verbal or physical) >50 yards | 10           |
|                                   | Wheelchair independent, including corners, >50 yards         | 5            |
|                                   | Immobile or <50 yards                                        | 0            |
| Stairs                            | Independent                                                  | 10           |
|                                   | Needs help (verbal, physical, carrying aid)                  | 5            |
|                                   | Unable                                                       | 0            |
