# Supplementary material for: Positive LGI1 Antibodies in CSF and Relapse Relate to Worse Outcome in Anti-LGI1 Encephalitis
Source: PubMed Central journal article supplement (PMC8718904; doi:10.3389/fimmu.2021.772096), 2021-12-17
Supplement: Table_2.pdf [file Table_2.pdf]

**Supplemental Table 2. The Modified Ranking Scale**

| <b>Symptoms</b>                                                                                                       | <b>Score</b> |
|-----------------------------------------------------------------------------------------------------------------------|--------------|
| No symptoms at all                                                                                                    | 0            |
| No significant disability despite symptoms; able to carry out all usual duties and activities                         | 1            |
| Slight disability; unable to carry out all previous activities, but able to look after own affairs without assistance | 2            |
| Moderate disability; requiring some help, but able to walk without assistance                                         | 3            |
| Moderately severe disability; unable to walk and attend to bodily needs without assistance                            | 4            |
| Severe disability; bedridden, incontinent and requiring constant nursing care and attention                           | 5            |
| Dead                                                                                                                  | 6            |
