# Supplementary material for: Positive LGI1 Antibodies in CSF and Relapse Relate to Worse Outcome in Anti-LGI1 Encephalitis
Source: PubMed Central journal article supplement (PMC8718904; doi:10.3389/fimmu.2021.772096), 2021-12-17
Supplement: Table_3.pdf [file Table_3.pdf]

**Supplemental Table 3. Comparison of clinical characteristics between patients with positive and negative CSF LGI1 antibodies<sup>#</sup>**

|                                      | <b>CSF LGI1<br/>antibody positive<br/>(N=42 )</b> | <b>CSF LGI1<br/>antibody negative<br/>(N=23 )</b> | <b>P value</b> |
|--------------------------------------|---------------------------------------------------|---------------------------------------------------|----------------|
| <b>Male/Female</b>                   | 24/18                                             | 14/11                                             | 0.961          |
| <b>Age at onset, y, mean±SD</b>      | 61.2±12.5                                         | 53.6±15.0                                         | <b>0.034*</b>  |
| <b>Symptom at diagnosis, n (%)</b>   |                                                   |                                                   |                |
| <b>Seizure</b>                       | 37 (88.1%)                                        | 21 (91.3%)                                        | 1.0            |
| <b>Cognitive deficit</b>             | 33 (78.6%)                                        | 12 (52.2%)                                        | <b>0.027*</b>  |
| <b>Psychosis</b>                     | 14 (34.1%)                                        | 5 (21.7%)                                         | 0.297          |
| <b>Consciousness disorder</b>        | 7 (16.7%)                                         | 2 (8.7%)                                          | 0.474          |
| <b>Speech disorder</b>               | 1 (2.4%)                                          | 3 (13.0%)                                         | 0.118          |
| <b>Personality change</b>            | 6 (19.4%)                                         | 7 (30.4%)                                         | 0.171          |
| <b>Sleep disorder</b>                | 2 (4.8%)                                          | 2 (8.7%)                                          | 0.61           |
| <b>Autonomic dysfunction</b>         | 4 (9.5%)                                          | 2 (8.7%)                                          | 1.0            |
| <b>Limb weakness</b>                 | 3 (7.1%)                                          | 3 (13.0%)                                         | 0.657          |
| <b>Hyponatremia, n (%)</b>           | 21 (50.0%)                                        | 7 (30.4%)                                         | 0.128          |
| <b>CSF findings, n (%)</b>           |                                                   |                                                   |                |
| <b>Cell count &gt; 5 cells/uL</b>    | 4 (10.0%)                                         | 5 (22.7%)                                         | 0.259          |
| <b>Protein &gt; 0.45 g/L</b>         | 13 (33.3%)                                        | 4 (18.2%)                                         | 0.205          |
| <b>Positive OB</b>                   | 7 (18.9%)                                         | 0 (0.0%)                                          | 0.082          |
| <b>EEG, n (%)</b>                    |                                                   |                                                   |                |
| <b>Normal</b>                        | 7 (16.7%)                                         | 5 (21.7%)                                         |                |
| <b>Epileptic discharge</b>           | 9 (21.4%)                                         | 10 (43.5%)                                        |                |
| <b>Slow wave</b>                     | 6 (14.3%)                                         | 1 (4.3%)                                          | 0.345          |
| <b>MRI, n (%)</b>                    |                                                   |                                                   |                |
| <b>Normal</b>                        | 21 (50.0%)                                        | 13 (56.6%)                                        |                |
| <b>Unilateral hippocampal lesion</b> | 12 (28.6%)                                        | 3 (13.0%)                                         |                |
| <b>Bilateral hippocampal lesions</b> | 9 (21.4%)                                         | 7 (30.4%)                                         | 0.457          |
| <b>Tumor, n (%)</b>                  | 3 (7.1%)                                          | 3 (13.0%)                                         | 0.332          |
| <b>Initial treatment, n (%)</b>      |                                                   |                                                   |                |
| <b>Corticosteroid</b>                | 33 (78.6%)                                        | 18 (81.8%)                                        | 1.0            |
| <b>IVIG</b>                          | 20 (47.6%)                                        | 10 (43.5%)                                        | 0.683          |
| <b>MMF</b>                           | 4 (9.5%)                                          | 2 (8.7%)                                          | 1.0            |
| <b>Antiepileptic drugs</b>           | 35 (92.1%)                                        | 21 (95.5%)                                        | 1.0            |
| <b>Residual symptoms, n (%)</b>      |                                                   |                                                   |                |
| <b>Cognitive impairment</b>          | 18 (42.9%)                                        | 10 (43.5%)                                        | 0.58           |
| <b>Epilepsy</b>                      | 9 (21.4%)                                         | 3 (13.0%)                                         | 0.32           |
| <b>Personality change</b>            | 4 (9.5%)                                          | 7 (30.4%)                                         | 0.168          |
| <b>BI upon admission, mean±SD</b>    | 76.9±18.4                                         | 87.0±17.4                                         | <b>0.036*</b>  |
| <b>BI at discharge, mean±SD</b>      | 78.8±23.6                                         | 90.0±13.1                                         | <b>0.016*</b>  |
| <b>Relapse, n (%)</b>                | 8 (23.5%)                                         | 2 (9.1%)                                          | 0.285          |

|                                         |         |         |                           |
|-----------------------------------------|---------|---------|---------------------------|
| <b>mRS upon admission, median (IQR)</b> | 2 (1~3) | 1 (1~1) | <b>0.003<sup>**</sup></b> |
| <b>mRS at 12 months, median (IQR)</b>   | 1 (0~2) | 0 (0~1) | <b>0.023<sup>*</sup></b>  |

Abbreviations: SD, standard deviation; CSF, cerebrospinal fluid; OB, oligoclonal band; EEG, electroencephalography; MRI, magnetic resonance imaging; IVIG: intravenous immunoglobins; MMF, mycophenolate mofetil; BI, Barthel Index; mRS, modified Ranking scale; IQR, interquartile range. Bold values indicate statistical significance. \*P<0.05; \*\*P<0.01. # Two patients were excluded for analysis due to incomplete data.
