# Supplementary material for: Positive LGI1 Antibodies in CSF and Relapse Relate to Worse Outcome in Anti-LGI1 Encephalitis
Source: PubMed Central journal article supplement (PMC8718904; doi:10.3389/fimmu.2021.772096), 2021-12-17
Supplement: Table_4.pdf [file Table_4.pdf]

**Supplemental Table 4. Comparison between relapsing and non-relapsing patients**

|                                         | <b>Non-Relapsing<br/>(N=47)</b> | <b>Relapsing<br/>(N=10)</b> | <b>P value</b> |
|-----------------------------------------|---------------------------------|-----------------------------|----------------|
| <b>Male/Female</b>                      | 25/22                           | 5/5                         | 0.564          |
| <b>Age at onset, y, mean±SD</b>         | 56.5±14.2                       | 65.9±12.3                   | 0.056          |
| <b>Symptom at diagnosis, n (%)</b>      |                                 |                             |                |
| <b>Seizure</b>                          | 42 (89.4%)                      | 9 (90%)                     | 1              |
| <b>Memory deficit</b>                   | 34 (72.3%)                      | 7 (70.0%)                   | 0.579          |
| <b>Psychosis</b>                        | 14 (30.4%)                      | 2 (20.0%)                   | 0.406          |
| <b>Consciousness disorder</b>           | 5 (10.6%)                       | 3 (30.0%)                   | 0.137          |
| <b>Speech disorder</b>                  | 3 (6.4%)                        | 0 (0.0%)                    | 1              |
| <b>Sleep disorder</b>                   | 3 (6.4%)                        | 0 (0.0%)                    | 1              |
| <b>Autonomic dysfunction</b>            | 5 (10.6%)                       | 0 (0.0%)                    | 0.366          |
| <b>Limb weakness</b>                    | 4 (8.5%)                        | 0 (0.0%)                    | 1              |
| <b>Hyponatremia, n (%)</b>              | 21 (44.7%)                      | 4 (40%)                     | 0.536          |
| <b>CSF findings, n (%)</b>              |                                 |                             |                |
| <b>Cell count &gt; 5 cells/uL</b>       | 7 (15.6%)                       | 2 (22.2%)                   | 0.469          |
| <b>Protein &gt; 0.45 g/L</b>            | 12 (27.3%)                      | 1 (11.1%)                   | 0.287          |
| <b>Positive OB</b>                      | 4 (10.0%)                       | 1 (12.5%)                   | 0.616          |
| <b>LG11 antibody, n (%)</b>             |                                 |                             |                |
| <b>CSF positive</b>                     | 26 (56.5%)                      | 8 (80.0%)                   | 0.154          |
| <b>Serum positive</b>                   | 47 (100%)                       | 10 (100%)                   | 1              |
| <b>EEG, n (%)</b>                       |                                 |                             |                |
| <b>Epileptic discharge</b>              | 17 (53.1%)                      | 1 (50%)                     | 1              |
| <b>Slow wave</b>                        | 5 (15.6%)                       | 1 (50%)                     | 0.477          |
| <b>MRI, n (%)</b>                       |                                 |                             |                |
| <b>Normal</b>                           | 23 (49.0%)                      | 7 (70.0%)                   |                |
| <b>Unilateral hippocampal lesion</b>    | 12 (25.5%)                      | 1 (10.0%)                   |                |
| <b>Bilateral hippocampal lesions</b>    | 12 (25.5%)                      | 2 (20.0%)                   | 0.512          |
| <b>Tumor, n (%)</b>                     | 4 (9.1%)                        | 2 (20%)                     | 0.456          |
| <b>Treatment, n (%)</b>                 |                                 |                             |                |
| <b>Corticosteroid</b>                   | 37 (80.4%)                      | 8 (80.0%)                   | 0.637          |
| <b>IVIG</b>                             | 23 (50.0%)                      | 5 (50.0%)                   | 1              |
| <b>MMF</b>                              | 5 (10.9%)                       | 0 (0.0%)                    | 0.573          |
| <b>Antiepileptic drugs</b>              | 40 (95.2%)                      | 9 (90%)                     | 0.481          |
| <b>Residual symptom, n (%)</b>          |                                 |                             |                |
| <b>Cognition impairment</b>             | 21 (44.7%)                      | 7 (70.0%)                   | 0.148          |
| <b>Epilepsy</b>                         | 6 (12.8%)                       | 6 (60.0%)                   | <b>0.002**</b> |
| <b>Personality change</b>               | 9 (19.1%)                       | 2 (20.0%)                   | 1              |
| <b>BI upon admission, mean±SD</b>       | 81.2±19.0                       | 74±20.1                     | 0.286          |
| <b>BI at discharge, mean±SD</b>         | 85.2±17.6                       | 72.5±24.0                   | 0.057          |
| <b>mRS upon admission, median (IQR)</b> | 1 (1~3)                         | 1 (1~3)                     | 0.954          |
| <b>mRS at 12 months, median (IQR)</b>   | 0 (0~1.25)                      | 1 (1~1.75)                  | 0.15           |

Abbreviations: SD, standard deviation; CSF, cerebrospinal fluid; OB, oligoclonal band; EEG, electroencephalography; MRI, magnetic resonance imaging; IVIG: intravenous immunoglobins; MMF, mycophenolate mofetil; BI, Barthel Index; mRS, modified Ranking scale; IQR, interquartile range. Bold value indicates statistical significance. \*P<0.05; \*\*P<0.01.
